# Supplementary material for: Closing the gap to effective gene drive in Aedes aegypti by exploiting germline regulatory elements
Source: PubMed Central journal article supplement (PMC9860013; doi:10.1038/s41467-023-36029-7), 2023-01-20
Supplement: 41467_2023_36029_MOESM1_ESM.pdf [file 41467_2023_36029_MOESM1_ESM.pdf]

## Supplementary information

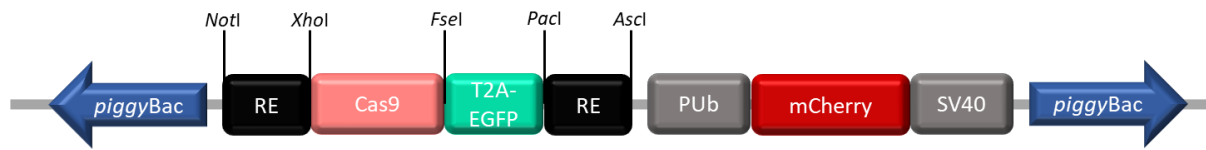

| line                         | Upstream RE                | Downstream RE                                    |
|------------------------------|----------------------------|--------------------------------------------------|
| <i>Sds3</i> -Cas9 (AGG1208)  | AaegL5_1:58240291-58242249 | AaegL5_1:58260607-58260914, additional P10 3'UTR |
| <i>zpg2k</i> -Cas9 (AGG1448) | AaegL5_2:84861078-84863147 | AaegL5_2:84865496-84865750, additional P10 3'UTR |

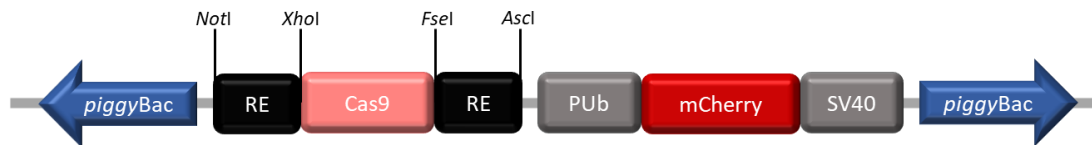

| line                          | Upstream RE                  | Downstream RE                |
|-------------------------------|------------------------------|------------------------------|
| <i>nos</i> -Cas9 (AGG1547)    | AaegL5_1:228706-229655       | AaegL5_1:240375-241057       |
| <i>shu</i> -Cas9 (AGG1551)    | AaegL5_3:281559539-281557722 | AaegL5_3:281556144-281556028 |
| <i>Ewal</i> -Cas9 (AGG1552)   | AaegL5_145302724-145300725   | AaegL5_3:145288952-145287807 |
| <i>zpg4kb</i> -Cas9 (AGG1687) | AaegL5_2:84858940-84863147   | AaegL5_2:84865496-84865750   |

**Supplementary Figure S1. Diagram of Cas9 constructs.** Full depiction of the piggyBac construct used for transgenesis. Restriction enzymes used for cloning are indicated. Tables list the regions of the genome amplified for use as the promoter (Upstream RE) and 3'UTR (downstream RE).

**Supplementary Table S1. Microinjection of embryos to generate Cas9-expressing lines.**

| Construct                    | No. of injected embryos | G <sub>0</sub> survivors (%) | G <sub>1</sub> larvae screened | Positive G <sub>1</sub> larvae | No. of positive pools (pool ID) | isolines analysed |
|------------------------------|-------------------------|------------------------------|--------------------------------|--------------------------------|---------------------------------|-------------------|
| <i>Ewald-Cas9</i> (AGG1552)  | 323                     | 24 (7.4)                     | 1916                           | 34                             | 1/3 (C)                         | C1, C3            |
| <i>nos-Cas9</i> (AGG1547)    | 346                     | 73 (21.1)                    | 2710                           | 122                            | 6/8 (A, B, C, D, H, J)          | A2, C2, D1        |
| <i>sds3-Cas9</i> (AGG1208)   | 990                     | 161 (16.3)                   | 4664                           | 464                            | 8/8 (A, B, C, D, E, F, G, H)    | A1, E1, G1        |
| <i>shu-Cas9</i> (AGG1551)    | 324                     | 92 (28.3)                    | 3444                           | 175                            | 5/10 (A, B, C, I, K)            | A1, B1, C1, C2    |
| <i>zpg2kb-Cas9</i> (AGG1448) | 442                     | 55 (12.4)                    | 13745                          | 46                             | 3/6 (C, D, E)                   | C1                |
| <i>zpg4kb-Cas9</i> (AGG1687) | 371                     | 27 (7.3)                     | 1189                           | 59                             | 1/3 (C)                         | C1, C2            |

**Supplementary Table S2. Heterozygous viability of *sds3G1-Cas9***

| (♀) WT X <i>sds3G1-Cas9/+</i> (♂) | Live | Dead | % Dead by sex | % Dead by type | Difference in % |
|-----------------------------------|------|------|---------------|----------------|-----------------|
| ♂ <i>sds3G1-Cas9</i>              | 276  | 63   | 18.58         | 16.39          | 0.23            |
| ♀ <i>sds3G1-Cas9</i>              | 270  | 44   | 14.01         |                |                 |
| ♂ WT                              | 280  | 52   | 15.66         | 16.61          |                 |
| ♀ WT                              | 242  | 52   | 17.69         |                |                 |

**Supplementary Table S3. Homozygous viability of *sds3-Cas9***

| <i>sds3G1-Cas9/+</i> X <i>sds3G1-Cas9/+</i> |     |      |     |      |       |
|---------------------------------------------|-----|------|-----|------|-------|
|                                             | -   | %    | +   | %    | Total |
| Larvae                                      | 187 | 27.9 | 484 | 72.1 | 671   |
| Adults                                      | 166 | 27.3 | 443 | 72.7 | 609   |
| Male adults                                 | 87  | 52.4 | 213 | 48.1 | 300   |
| Females adults                              | 79  | 47.6 | 230 | 51.9 | 309   |

**Supplementary Table S4. Inheritance rate of *kmo*<sup>sgRNAs</sup>**

| F <sub>0</sub>                                               | Inheritance rate of <i>kmo</i> <sup>sgRNAs</sup> (%) |                              |
|--------------------------------------------------------------|------------------------------------------------------|------------------------------|
|                                                              | No. of larvae screened                               |                              |
|                                                              | F <sub>1</sub> transhet female                       | F <sub>1</sub> transhet male |
| ♀ <i>kmo</i> <sup>sgRNAs</sup> X ♂ <i>sds3G1</i> -Cas9       | 89.8<br>421                                          | 69.6<br>1265                 |
| ♀ <i>kmo</i> <sup>sgRNAs</sup> ; <i>sds3G1</i> -Cas9 X ♂ LVP | 92.0<br>162                                          | 85.3<br>868                  |
| ♀ LVP X ♂ <i>kmo</i> <sup>sgRNAs</sup> ; <i>sds3G1</i> -Cas9 | 97.6<br>455                                          | 97.0<br>1804                 |
| Total inheriting                                             | 971                                                  | 3371                         |
| Total larvae screened                                        | 1038                                                 | 3937                         |
| Overall inheritance (%)                                      | 93.5                                                 | 85.6                         |
| Homing rate (%)                                              | 87.1                                                 | 71.2                         |

**Supplementary Table S5. Genomic locus of Cas9 transgene integrations.**

| Isoline             | Genomic sequence ID (VectorBase) | Nucleotide position     | region                                                                                                                 |
|---------------------|----------------------------------|-------------------------|------------------------------------------------------------------------------------------------------------------------|
| <i>shuA</i> -Cas9   | AaegL5_3                         | 380,318,728-380,318,729 | intronic between exon 5 and 6 of AAEL000961 (unspecified product) and exon 1 and 2 of AAEL000943 (unspecified product) |
| <i>shuB</i> -Cas9   | AaegL5_1                         | 194,389,299-194,389,300 | intergenic between AAEL027430 (unspecified product) and AAEL010001 (unspecified product)                               |
| <i>shuC1</i> -Cas9  | AaegL5_3                         | 191,252,140-191,252,141 | intronic between exon 1 and 2 of AAEL007171 (Protein phosphatase 2c)                                                   |
| <i>shuC2</i> -Cas9  | AaegL5_3                         | 18,109,307-18,109,308   | within exon 1 of AAEL020025 unspecified lncRNA                                                                         |
| <i>sds3A</i> -Cas9* | AaegL5_3                         | 207,249,192-207,249,193 | intergenic between AAEL023012 (unspecified lncRNA) and AAEL007794 (defective proboscis extension response)             |
| <i>sds3E</i> -Cas9* | AaegL5_3                         | 312,663,232-312,663,233 | intronic between exon 1 and 2 of the 5'UTR of AAEL023098 (unspecified product)                                         |
| <i>sds3G</i> -Cas9  | AaegL5_3                         | 338,343,812-338,343,813 | intronic between the first and second coding exons of AAEL002469 (endophilin a)                                        |

\*these insertion sites have not been confirmed by PCR and Sanger sequencing

**Supplementary Table S6. List of oligonucleotides.**

| Oligo ID                | Function                                       | Sequence (5'-3')                                                                                     |
|-------------------------|------------------------------------------------|------------------------------------------------------------------------------------------------------|
| LA179<br>LA191          | Adapter for MspI-digested DNA                  | GTGTAGCGTGAAGACGACAGAAAGGGCGTGGTG <b>CGGAGGGCGGTG</b><br>CG <b>CACCGCCCTCCG</b>                      |
| LA179<br>LA192          | Adapter for BamHI-digested DNA                 | GTGTAGCGTGAAGACGACAGAAAGGGCGTGGTG <b>CGGAGGGCGGTG</b><br>GATC <b>CACCGCCCTCCG</b>                    |
| LA179<br>LA1703         | Adapter for NcoI-digested DNA                  | GTGTAGCGTGAAGACGACAGAAAGGGCGTGGTG <b>CGGAGGGCGGTG</b><br>CATG <b>CACCGCCCTCCG</b>                    |
| LA187<br>LA183          | 5' end primary adapter ligation-mediated PCR   | GTGTAGCGTGAAGACGACAGAA<br>CAGTGACACTTACCGATTGACAAG                                                   |
| LA187<br>LA182          | 5' end secondary adapter ligation-mediated PCR | GTGTAGCGTGAAGACGACAGAA<br>GGCGACTGAGATGTCTAAATGCAC                                                   |
| LA187<br>LA184          | 3' end primary adapter ligation-mediated PCR   | GTGTAGCGTGAAGACGACAGAA<br>CAGACCGATAAAACACATGCGTCA                                                   |
| LA187<br>LA1064         | 3' end secondary adapter ligation-mediated PCR | GTGTAGCGTGAAGACGACAGAA<br>ACGCATGATTATCTTTAACGTACG                                                   |
| LA1084<br>LA1350 (nest) | sds3 5'RACE                                    | TGTGCTGTTTCGTATGGTTCCGGATGG<br>TCGTCCAGCAAAGAACCAACTGCCAG                                            |
| LA1082<br>LA1083 (nest) | sds3 3'RACE                                    | ACGTCGACCTAATGAACCGCTTCCG<br>GGGCAGTTGGTTCTTTTGCTGGACG                                               |
| LA2956<br>LA2955 (nest) | ewald 5'RACE                                   | CGCTTGAGGCCACGTCCCGTCGATGAGAATGAG<br>GGGAACGAGTGGCTGCGGTGGCAGCGCCGAAC                                |
| LA2958<br>LA2957 (nest) | ewald 3'RACE                                   | CTCATTCTCATCGACGGGACGTGGCCCTCAAGCG<br>GCCATCGAAGCGCTGAGCATTCTGGAGCGGGAC                              |
| LA2952<br>LA2951 (nest) | shu 5'RACE                                     | CGGTCCCAGGGATTTCATGATCTTACGGTGGGC<br>GGTGTGATCTGGAATTGGGCTCCATGTTCCCGC                               |
| LA2954<br>LA2953 (nest) | shu 3'RACE                                     | CGATGAAGAAGAACCTGGAGGAGTTTGTGGCGG<br>GGGCCTCACCACCAAGGAGATGGACATCGTCCAGG                             |
| LA2963<br>LA2964 (nest) | zpg 5'RACE                                     | GGAAGGCGAAGATTTTCTCGTTGACGATGTTCTGCGGCAGA<br>CCCAGTGTCCAACAGAAGCTGTGTAGACTGCCCT                      |
| LA2965<br>LA2966 (nest) | zpg 3'RACE                                     | CGCCTTCTGTGGCTTTGGTTCATTGTGCTGGCCG<br>CCTGCCGACGCTTCGGTTCCAACCTGTTGTTACG                             |
| LA2811<br>LA2812        | ewald promoter                                 | TTTTGCGGCCGCACTGTTCAACTGATTCTTCAAGAATACC<br>TTTTCTCGAGTTTCACTATTCAAAGGACTTTCTTTCAAATCTCACC           |
| LA4066<br>LA4077        | ewald 3'UTR                                    | TTTTGGCCGGCCAGGCAAAAAAGAAAAGTCTCCGGGGGTTGGTGTGTTTCTGTCAG<br>TTTTGGCCGGCCCTTCAGACAAAATCAGTTGAGAATTAAG |
| LA3769<br>LA3770        | nos promoter                                   | TTTTGCGGCCGCATCACTATCAAACCCTAAAGACA<br>TTTTCTCGAGTTCCGTTTACGTTTGCACCGCTTTATGACC                      |

|                  |                     |                                                                                                               |
|------------------|---------------------|---------------------------------------------------------------------------------------------------------------|
| LA4072<br>LA4083 | nos 3'UTR           | TTTTGGCCGGCCAGGCAAAAAAGAAAAAGTTGTTTTTTTTATGAAATGTTTCTGACTGTGAC<br>TTTTGGCGCGCCACCAGACATCCGTTTAAGCTGAACCAC     |
| LA1798<br>LA1728 | sds3 promoter       | TTTTGCGGCCGCTCTGTTTGAATATGTTCCGAGAA<br>TTTTCTCGAGTTTCCGCGACAAAAACACAGA                                        |
| LA1739<br>LA1740 | sds3 3'UTR          | TTTTTAATTAAGGAAACAAGGATCTCAACTCTCGAGC<br>TTTTGCGATCGCCCTCGAGCTTCTTAGGTACAATTGTA AACATAGTT                     |
| LA2807<br>LA2808 | shu promoter        | TTTTGCGGCCGCTCTTCACA ACTCCAAATTCTACCACATCTTCGG<br>TTTTCTCGAGTGTTTGAAGATTTAAGTTTTTGAATGAAAAAGATGG              |
| LA4063<br>LA4076 | shu 3'UTR           | TTTTGGCCGGCCAGGCAAAAAAGAAAAAGGAAACAAGGATCTCAACTCTCGAGC<br>TTTTGGCGCGCCTATATGATTGAGTAGGTAGTCATTTATTTTCAG       |
| LA2803<br>LA2804 | zpg2kb promoter     | TTTTGCGGCCGCCAGCTGATTTGAGACGTCATTTGAATAGGCC<br>TTTTCTCGAGGATGATTTAGGGGTTTGAACGTTTCTTTTTTCGGTA                 |
| LA3945<br>LA3946 | zpg4kb promoter     | ACGGTCACGGCGGGCATGTCGACGCAGCGTAATGATACTGCGCTATTTATG<br>TCCGTCGTGGTCCCTATAGTCCATCGATGATTTAGGGGTTTGAACG         |
| LA2805<br>LA2806 | zpg 3'UTR (2kb pro) | TTTTTAATTAATCGATAAAAGTATCGTCCTAAGACTTATTCAG<br>TTTTTTTTGCGATCGCTTATGTTTACATACTTTATTCTATATTTGC                 |
| LA4067<br>LA4078 | zpg 3'UTR (4kb pro) | TTTTGGCCGGCCAGGCAAAAAAGAAAAAGTTCGATAAAAGTATCGTCCTAAGACTTATTCAG<br>TTTTGGCGCGCCCTTATGTTTACATACTTTATTCTATATTTGC |

Oligos used to make adapters complement at regions highlighted in yellow.

**Supplementary Note 1.** Structure and associated parameter values used for the mathematical model.

### Mathematical model

Here we use a deterministic, discrete generation model of population genetics within a large and panmictic population – similar to that used in our previous work<sup>1</sup>. The assumptions upon which this model is based are well founded and have previously been discussed at length<sup>2-8</sup> so for brevity that discussion need not be repeated here. This model uses recursion equations to calculate the genotype frequencies in a generation ( $i + 1$ ) based on those in the previous generation ( $i$ ), giving equations of the form

$$M_1^{i+1} = \frac{\Omega_{M1}}{2} \left( M_1^i F_1^i + 0.5 M_1^i F_2^i + 0.5 M_1^i F_4^i + 0.25 M_1^i F_5^i (1 - \Phi_F) + 0.5 M_2^i F_1^i + 0.25 M_2^i F_2^i \right. \\ \left. + 0.25 M_2^i F_4^i + 0.125 M_2^i F_5^i (1 - \Phi_F) + 0.5 M_4^i F_1^i + 0.25 M_4^i F_2^i + 0.25 M_4^i F_4^i \right. \\ \left. + 0.125 M_4^i F_5^i (1 - \Phi_F) + 0.25 M_5^i (1 - \Phi_M) F_1^i + 0.125 M_5^i (1 - \Phi_M) F_2^i \right. \\ \left. + 0.125 M_5^i (1 - \Phi_M) F_4^i + 0.0625 M_5^i (1 - \Phi_M) F_5^i (1 - \Phi_F) \right) / \hat{\Omega},$$

$$M_2^{i+1} = \frac{\Omega_{M2}}{2} \left( 0.5 M_1^i F_2^i + M_1^i F_3^i + 0.25 M_1^i F_5^i (1 - \Phi_F) + 0.5 M_1^i F_6^i + 0.5 M_2^i F_1^i + 0.5 M_2^i F_2^i \right. \\ \left. + 0.5 M_2^i F_3^i + 0.25 M_2^i F_4^i + 0.25 M_2^i F_5^i (1 - \Phi_F) + 0.25 M_2^i F_6^i + M_3^i F_1^i + 0.5 M_3^i F_2^i \right. \\ \left. + 0.5 M_3^i F_4^i + 0.25 M_3^i F_5^i (1 - \Phi_F) + 0.25 M_4^i F_2^i + 0.5 M_4^i F_3^i + 0.125 M_4^i F_5^i (1 - \Phi_F) \right. \\ \left. + 0.25 M_4^i F_6^i + 0.25 M_5^i (1 - \Phi_M) F_1^i + 0.25 M_5^i (1 - \Phi_M) F_2^i + 0.25 M_5^i (1 - \Phi_M) F_3^i \right. \\ \left. + 0.125 M_5^i (1 - \Phi_M) F_4^i + 0.125 M_5^i (1 - \Phi_M) F_5^i (1 - \Phi_F) + 0.125 M_5^i (1 - \Phi_M) F_6^i \right. \\ \left. + 0.5 M_6^i F_1^i + 0.25 M_6^i F_2^i + 0.25 M_6^i F_4^i + 0.125 M_6^i F_5^i (1 - \Phi_F) + 0.5 M_1^i F_5^i \Phi_F \right. \\ \left. + 0.25 M_2^i F_5^i \Phi_F + 0.25 M_4^i F_5^i \Phi_F + 0.125 M_5^i F_5^i \Phi_F (1 - \Phi_M) + 0.5 M_5^i F_1^i \Phi_M \right. \\ \left. + 0.25 M_5^i F_2^i \Phi_M + 0.25 M_5^i F_4^i \Phi_M + 0.125 M_5^i F_5^i \Phi_M (1 - \Phi_F) \right. \\ \left. + 0.125 (1 - \Phi_M) M_5^i \Phi_F F_8^i \right) / \hat{\Omega},$$

$$M_3^{i+1} = \frac{\Omega_{M3}}{2} \left( 0.25 M_2^i F_2^i + 0.5 M_2^i F_3^i + 0.125 M_2^i F_5^i (1 - \Phi_F) + 0.25 M_2^i F_6^i + 0.5 M_3^i F_2^i + M_3^i F_3^i \right. \\ \left. + 0.25 M_3^i F_5^i (1 - \Phi_F) + 0.5 M_3^i F_6^i + 0.125 M_5^i (1 - \Phi_M) F_2^i + 0.25 M_5^i (1 - \Phi_M) F_3^i \right. \\ \left. + 0.0625 M_5^i (1 - \Phi_M) F_5^i (1 - \Phi_F) + 0.125 M_5^i (1 - \Phi_M) F_6^i + 0.25 M_6^i F_2^i \right. \\ \left. + 0.5 M_6^i F_3^i + 0.125 M_6^i F_5^i (1 - \Phi_F) + 0.25 M_6^i F_6^i + 0.25 M_2^i F_5^i \Phi_F + 0.5 M_3^i F_5^i \Phi_F \right. \\ \left. + 0.125 M_5^i F_5^i \Phi_F (1 - \Phi_M) + 0.25 M_6^i F_5^i \Phi_F + 0.25 M_5^i F_2^i \Phi_M + 0.5 M_5^i F_3^i \Phi_M \right. \\ \left. + 0.125 M_5^i F_5^i \Phi_M (1 - \Phi_F) + 0.25 M_5^i F_6^i \Phi_M + 0.25 M_5^i F_5^i \Phi_M \Phi_F \right. \\ \left. + 0.125 (1 - \Phi_M) M_5^i \Phi_F F_8^i \right) / \hat{\Omega},$$

$$M_4^{i+1} = \frac{\Omega_{M4}}{2} \left( 0.5 M_1^i F_4^i + 0.25 M_1^i F_5^i (1 - \Phi_F) + M_1^i F_7^i + 0.5 M_1^i F_8^i (1 - \Phi_F) + 0.25 M_2^i F_4^i \right. \\ \left. + 0.125 M_2^i F_5^i (1 - \Phi_F) + 0.5 M_2^i F_7^i + 0.25 M_2^i F_8^i (1 - \Phi_F) + 0.5 M_4^i F_1^i + 0.25 M_4^i F_2^i \right. \\ \left. + 0.5 M_4^i F_4^i + 0.25 M_4^i F_5^i (1 - \Phi_F) + 0.5 M_4^i F_7^i + 0.25 M_4^i F_8^i (1 - \Phi_F) \right. \\ \left. + 0.25 M_5^i (1 - \Phi_M) F_1^i + 0.125 M_5^i (1 - \Phi_M) F_2^i + 0.25 M_5^i (1 - \Phi_M) F_4^i \right. \\ \left. + 0.125 M_5^i (1 - \Phi_M) F_5^i (1 - \Phi_F) + 0.25 M_5^i (1 - \Phi_M) F_7^i \right. \\ \left. + 0.125 M_5^i (1 - \Phi_M) F_8^i (1 - \Phi_F) + M_7^i F_1^i + 0.5 M_7^i F_2^i + 0.5 M_7^i F_4^i \right. \\ \left. + 0.25 M_7^i F_5^i (1 - \Phi_F) + 0.5 M_8^i (1 - \Phi_M) F_1^i + 0.25 M_8^i (1 - \Phi_M) F_2^i \right. \\ \left. + 0.25 M_8^i (1 - \Phi_M) F_4^i + 0.125 M_8^i (1 - \Phi_M) F_5^i (1 - \Phi_F) \right) / \hat{\Omega},$$

$$\begin{aligned}
M_5^{i+1} = \frac{\Omega_{M5}}{2} & \left( 0.25 M_1^i F_5^i (1 - \Phi_F) + 0.5 M_1^i F_6^i + 0.5 M_1^i F_8^i (1 - \Phi_F) + M_1^i F_9^i + 0.25 M_2^i F_4^i \right. \\
& + 0.25 M_2^i F_5^i (1 - \Phi_F) + 0.25 M_2^i F_6^i + 0.5 M_2^i F_7^i + 0.5 M_2^i F_8^i (1 - \Phi_F) + 0.5 M_2^i F_9^i \\
& + 0.5 M_3^i F_4^i + 0.25 M_3^i F_5^i (1 - \Phi_F) + M_3^i F_7^i + 0.5 M_3^i F_8^i (1 - \Phi_F) + 0.25 M_4^i F_2^i \\
& + 0.5 M_4^i F_3^i + 0.25 M_4^i F_5^i (1 - \Phi_F) + 0.5 M_4^i F_6^i + 0.25 M_4^i F_8^i (1 - \Phi_F) + 0.5 M_4^i F_9^i \\
& + 0.25 M_5^i (1 - \Phi_M) F_1^i + 0.25 M_5^i (1 - \Phi_M) F_2^i + 0.25 M_5^i (1 - \Phi_M) F_3^i \\
& + 0.25 M_5^i (1 - \Phi_M) F_4^i + 0.25 M_5^i (1 - \Phi_M) F_5^i (1 - \Phi_F) + 0.25 M_5^i (1 - \Phi_M) F_6^i \\
& + 0.25 M_5^i (1 - \Phi_M) F_7^i + 0.25 M_5^i (1 - \Phi_M) F_8^i (1 - \Phi_F) + 0.25 M_5^i (1 - \Phi_M) F_9^i \\
& + 0.5 M_6^i F_1^i + 0.25 M_6^i F_2^i + 0.5 M_6^i F_4^i + 0.25 M_6^i F_5^i (1 - \Phi_F) + 0.5 M_6^i F_7^i \\
& + 0.25 M_6^i F_8^i (1 - \Phi_F) + 0.5 M_7^i F_2^i + M_7^i F_3^i + 0.25 M_7^i F_5^i (1 - \Phi_F) + 0.5 M_7^i F_6^i \\
& + 0.5 M_8^i (1 - \Phi_M) F_1^i + 0.5 M_8^i (1 - \Phi_M) F_2^i + 0.5 M_8^i (1 - \Phi_M) F_3^i \\
& + 0.25 M_8^i (1 - \Phi_M) F_4^i + 0.25 M_8^i (1 - \Phi_M) F_5^i (1 - \Phi_F) + 0.25 M_8^i (1 - \Phi_M) F_6^i + M_9^i F_1^i \\
& + 0.5 M_9^i F_2^i + 0.5 M_9^i F_4^i + 0.25 M_9^i F_5^i (1 - \Phi_F) + 0.5 M_1^i F_5^i \Phi_F + M_1^i F_8^i \Phi_F \\
& + 0.25 M_2^i F_5^i \Phi_F + 0.5 M_2^i F_8^i \Phi_F + 0.5 M_4^i F_5^i \Phi_F + 0.5 M_4^i F_8^i \Phi_F \\
& + 0.25 M_5^i F_5^i \Phi_F (1 - \Phi_M) + 0.25 M_5^i F_8^i \Phi_F (1 - \Phi_M) + 0.5 M_7^i F_5^i \Phi_F \\
& + 0.25 M_8^i F_5^i \Phi_F (1 - \Phi_M) + 0.5 M_5^i F_1^i \Phi_M + 0.25 M_5^i F_2^i \Phi_M + 0.5 M_5^i F_4^i \Phi_M \\
& + 0.25 M_5^i F_5^i \Phi_M (1 - \Phi_F) + 0.5 M_5^i F_7^i \Phi_M + 0.25 M_5^i F_8^i \Phi_M (1 - \Phi_F) + M_8^i F_1^i \Phi_M \\
& \left. + 0.5 M_8^i F_2^i \Phi_M + 0.5 M_8^i F_4^i \Phi_M + 0.25 M_8^i F_5^i \Phi_M (1 - \Phi_F) \right) / \hat{\Omega},
\end{aligned}$$

$$\begin{aligned}
M_6^{i+1} = \frac{\Omega_{M6}}{2} & \left( 0.125 M_2^i F_5^i (1 - \Phi_F) + 0.25 M_2^i F_6^i + 0.25 M_2^i F_8^i (1 - \Phi_F) + 0.5 M_2^i F_9^i \right. \\
& + 0.25 M_3^i F_5^i (1 - \Phi_F) + 0.5 M_3^i F_6^i + 0.5 M_3^i F_8^i (1 - \Phi_F) + M_3^i F_9^i \\
& + 0.125 M_5^i (1 - \Phi_M) F_2^i + 0.25 M_5^i (1 - \Phi_M) F_3^i + 0.125 M_5^i (1 - \Phi_M) F_5^i (1 - \Phi_F) \\
& + 0.25 M_5^i (1 - \Phi_M) F_6^i + 0.125 M_5^i (1 - \Phi_M) F_8^i (1 - \Phi_F) + 0.25 M_5^i (1 - \Phi_M) F_9^i \\
& + 0.25 M_6^i F_2^i + 0.5 M_6^i F_3^i + 0.25 M_6^i F_5^i (1 - \Phi_F) + 0.5 M_6^i F_6^i + 0.25 M_6^i F_8^i (1 - \Phi_F) \\
& + 0.5 M_6^i F_9^i + 0.25 M_8^i (1 - \Phi_M) F_2^i + 0.5 M_8^i (1 - \Phi_M) F_3^i \\
& + 0.125 M_8^i (1 - \Phi_M) F_5^i (1 - \Phi_F) + 0.25 M_8^i (1 - \Phi_M) F_6^i + 0.5 M_9^i F_2^i + M_9^i F_3^i \\
& + 0.25 M_9^i F_5^i (1 - \Phi_F) + 0.5 M_9^i F_6^i + 0.25 M_2^i F_5^i \Phi_F + 0.5 M_2^i F_8^i \Phi_F + 0.5 M_3^i F_5^i \Phi_F \\
& + M_3^i F_8^i \Phi_F + 0.25 M_5^i F_5^i \Phi_F (1 - \Phi_M) + 0.25 M_5^i F_8^i \Phi_F (1 - \Phi_M) + 0.5 M_6^i F_5^i \Phi_F \\
& + 0.5 M_6^i F_8^i \Phi_F + 0.25 M_8^i F_5^i \Phi_F (1 - \Phi_M) + 0.5 M_9^i F_5^i \Phi_F + 0.25 M_5^i F_2^i \Phi_M \\
& + 0.5 M_5^i F_3^i \Phi_M + 0.25 M_5^i F_5^i \Phi_M (1 - \Phi_F) + 0.5 M_5^i F_6^i \Phi_M + 0.25 M_5^i F_8^i \Phi_M (1 - \Phi_F) \\
& + 0.5 M_5^i F_9^i \Phi_M + 0.5 M_8^i F_2^i \Phi_M + M_8^i F_3^i \Phi_M + 0.25 M_8^i F_5^i \Phi_M (1 - \Phi_F) + 0.5 M_8^i F_6^i \Phi_M \\
& \left. + 0.5 M_5^i F_5^i \Phi_M \Phi_F + 0.5 M_5^i F_8^i \Phi_M \Phi_F + 0.5 M_8^i F_5^i \Phi_M \Phi_F \right) / \hat{\Omega},
\end{aligned}$$

$$\begin{aligned}
M_7^{i+1} = \frac{\Omega_{M7}}{2} & \left( 0.25 M_4^i F_4^i + 0.125 M_4^i F_5^i (1 - \Phi_F) + 0.5 M_4^i F_7^i + 0.25 M_4^i F_8^i (1 - \Phi_F) \right. \\
& + 0.125 M_5^i (1 - \Phi_M) F_4^i + 0.0625 M_5^i (1 - \Phi_M) F_5^i (1 - \Phi_F) + 0.25 M_5^i (1 - \Phi_M) F_7^i \\
& + 0.125 M_5^i (1 - \Phi_M) F_8^i (1 - \Phi_F) + 0.5 M_7^i F_4^i + 0.25 M_7^i F_5^i (1 - \Phi_F) + M_7^i F_7^i \\
& + 0.5 M_7^i F_8^i (1 - \Phi_F) + 0.25 M_8^i (1 - \Phi_M) F_4^i + 0.125 M_8^i (1 - \Phi_M) F_5^i (1 - \Phi_F) \\
& \left. + 0.5 M_8^i (1 - \Phi_M) F_7^i + 0.25 M_8^i (1 - \Phi_M) F_8^i (1 - \Phi_F) \right) / \hat{\Omega},
\end{aligned}$$

$$\begin{aligned}
M_8^{i+1} = \frac{\Omega_{M8}}{2} & \left( 0.125 M_4^i F_5^i (1 - \Phi_F) + 0.25 M_4^i F_6^i + 0.25 M_4^i F_8^i (1 - \Phi_F) + 0.5 M_4^i F_9^i \right. \\
& + 0.125 M_5^i (1 - \Phi_M) F_4^i + 0.125 M_5^i (1 - \Phi_M) F_5^i (1 - \Phi_F) + 0.125 M_5^i (1 - \Phi_M) F_6^i \\
& + 0.25 M_5^i (1 - \Phi_M) F_7^i + 0.25 M_5^i (1 - \Phi_M) F_8^i (1 - \Phi_F) + 0.25 M_5^i (1 - \Phi_M) F_9^i \\
& + 0.25 M_6^i F_4^i + 0.125 M_6^i F_5^i (1 - \Phi_F) + 0.5 M_6^i F_7^i + 0.25 M_6^i F_8^i (1 - \Phi_F) \\
& + 0.25 M_7^i F_5^i (1 - \Phi_F) + 0.5 M_7^i F_6^i + 0.5 M_7^i F_8^i (1 - \Phi_F) + M_7^i F_9^i \\
& + 0.25 M_8^i (1 - \Phi_M) F_4^i + 0.25 M_8^i (1 - \Phi_M) F_5^i (1 - \Phi_F) + 0.25 M_8^i (1 - \Phi_M) F_6^i \\
& + 0.5 M_8^i (1 - \Phi_M) F_7^i + 0.5 M_8^i (1 - \Phi_M) F_8^i (1 - \Phi_F) + 0.5 M_8^i (1 - \Phi_M) F_9^i \\
& + 0.5 M_9^i F_4^i + 0.25 M_9^i F_5^i (1 - \Phi_F) + M_9^i F_7^i + 0.5 M_9^i F_8^i (1 - \Phi_F) + 0.25 M_4^i F_5^i \Phi_F \\
& + 0.5 M_4^i F_8^i \Phi_F + 0.125 M_5^i F_5^i \Phi_F (1 - \Phi_M) + 0.125 M_5^i F_8^i \Phi_F (1 - \Phi_M) \\
& + 0.5 M_7^i F_5^i \Phi_F + M_7^i F_8^i \Phi_F + 0.25 M_8^i F_5^i \Phi_F (1 - \Phi_M) + 0.5 M_8^i F_8^i \Phi_F (1 - \Phi_M) \\
& + 0.25 M_5^i F_4^i \Phi_M + 0.125 M_5^i F_5^i \Phi_M (1 - \Phi_F) + 0.5 M_5^i F_7^i \Phi_M \\
& + 0.25 M_5^i F_8^i \Phi_M (1 - \Phi_F) + 0.5 M_8^i F_4^i \Phi_M + 0.25 M_8^i F_5^i \Phi_M (1 - \Phi_F) + M_8^i F_7^i \Phi_M \\
& \left. + 0.5 M_8^i F_8^i \Phi_M (1 - \Phi_F) \right) / \hat{\Omega},
\end{aligned}$$

$$\begin{aligned}
M_9^{i+1} = \frac{\Omega_{M9}}{2} & \left( 0.0625 M_5^i (1 - \Phi_M) F_5^i (1 - \Phi_F) + 0.125 M_5^i (1 - \Phi_M) F_6^i \right. \\
& + 0.125 M_5^i (1 - \Phi_M) F_8^i (1 - \Phi_F) + 0.25 M_5^i (1 - \Phi_M) F_9^i + 0.125 M_6^i F_5^i (1 - \Phi_F) \\
& + 0.25 M_6^i F_6^i + 0.25 M_6^i F_8^i (1 - \Phi_F) + 0.5 M_6^i F_9^i + 0.125 M_8^i (1 - \Phi_M) F_5^i (1 - \Phi_F) \\
& + 0.25 M_8^i (1 - \Phi_M) F_6^i + 0.25 M_8^i (1 - \Phi_M) F_8^i (1 - \Phi_F) + 0.5 M_8^i (1 - \Phi_M) F_9^i \\
& + 0.25 M_9^i F_5^i (1 - \Phi_F) + 0.5 M_9^i F_6^i + 0.5 M_9^i F_8^i (1 - \Phi_F) + M_9^i F_9^i \\
& + 0.125 M_5^i F_5^i \Phi_F (1 - \Phi_M) + 0.125 M_5^i F_8^i \Phi_F (1 - \Phi_M) + 0.25 M_6^i F_5^i \Phi_F \\
& + 0.5 M_6^i F_8^i \Phi_F + 0.25 M_8^i F_5^i \Phi_F (1 - \Phi_M) + 0.5 M_8^i F_8^i \Phi_F (1 - \Phi_M) + 0.5 M_9^i F_5^i \Phi_F \\
& + M_9^i F_8^i \Phi_F + 0.125 M_5^i F_5^i \Phi_M (1 - \Phi_F) + 0.25 M_5^i F_6^i \Phi_M + 0.25 M_5^i F_8^i \Phi_M (1 - \Phi_F) \\
& + 0.5 M_5^i F_9^i \Phi_M + 0.25 M_8^i F_5^i \Phi_M (1 - \Phi_F) + 0.5 M_8^i F_6^i \Phi_M + 0.5 M_8^i F_8^i \Phi_M (1 - \Phi_F) \\
& + M_8^i F_9^i \Phi_M + 0.25 M_5^i F_5^i \Phi_M \Phi_F + 0.5 M_5^i F_8^i \Phi_M \Phi_F + 0.5 M_8^i F_5^i \Phi_M \Phi_F + M_8^i F_8^i \Phi_M \Phi_F \\
& \left. \right) / \hat{\Omega},
\end{aligned}$$

and an equivalent set of equations for females of each genotype. These are identical to the above except  $\Omega_{Mj}$  parameters are swapped for  $\Omega_{Fj}$  where  $j = 1, \dots, 9$ . In these equations  $M_j$  and  $F_j$  (for  $j = 1, \dots, 9$ ) represent frequencies of males and females of the nine possible genotypes,  $\Phi_M$  and  $\Phi_F$  are the homing rates in males and females,  $\Omega_k$  (for  $k = M_1, \dots, M_9, F_1, \dots, F_9$ ) denotes the relative fitness of genotype  $k$  and  $\hat{\Omega}$  is a normalisation factor calculated as the sum of numerators in the eighteen recursion equations (the nine shown above and their female equivalents). Parameter sets for this model under each different model configuration are shown in Supplementary Table S7.

Calculations for fitness parameters were based on Mendelian inheritance rates and the numbers of WT insects obtained from sibling crosses. We expect 25% homozygotes, 50% heterozygotes and 25% WT from *sds3-Cas9/+* females crossed to *sds3-Cas9/+* males. In this cross we obtained 87 WT male adults, so we would expect 87 homozygous males and 174 ( $87 \times 2$ ) heterozygous males if there was no fitness cost to the transgene. We assume there is no fitness cost to the heterozygotes and we obtained 213 fluorescent male adults. If we subtract the expected 174 heterozygotes from the 213 total we are left with 39 homozygotes. We calculated that we expect 87 homozygous and 39 is only 44.83% of that, therefore we calculate a 55% fitness cost for homozygous males. The same calculation was performed for females and the parameter values are listed in Supplementary Table S7.



**Supplementary Table S7.** Parameter values for each configuration of the split CRISPR gene drive. Calculations used in deriving these values are outlined in Supplementary Tables S2 and S3.

| Symbol        | Definition                         | <i>sds3G1-Cas9 / kmo<sup>sgRNAs</sup></i>                         |            |            |
|---------------|------------------------------------|-------------------------------------------------------------------|------------|------------|
|               |                                    | Female Value                                                      | Male Value | Source     |
| $\Omega_{A+}$ | Relative fitness (A heterozygotes) | 1.00                                                              | 1.00       | 1          |
| $\Omega_{AA}$ | Relative fitness (A homozygotes)   | 0.81                                                              | 0.81       | 1          |
| $\Omega_{B+}$ | Relative fitness (B heterozygotes) | 1.00                                                              | 1.00       | This study |
| $\Omega_{BB}$ | Relative fitness (B homozygotes)   | 0.91                                                              | 0.45       | This study |
| $\Phi$        | Homing rate                        | 0.87                                                              | 0.71       | This study |
|               |                                    | <i>bgn-Cas9 / kmo<sup>sgRNAs</sup></i>                            |            |            |
| $\Omega_{A+}$ | Relative fitness (A heterozygotes) | 1.00                                                              | 1.00       | 1          |
| $\Omega_{AA}$ | Relative fitness (A homozygotes)   | 0.81                                                              | 0.81       | 1          |
| $\Omega_{B+}$ | Relative fitness (B heterozygotes) | 1.00                                                              | 1.00       | 1          |
| $\Omega_{BB}$ | Relative fitness (B homozygotes)   | 0.79                                                              | 0.79       | 1          |
| $\Phi$        | Homing rate                        | 0.54                                                              | 0.36       | 1          |
|               |                                    | <i>nup50-Cas9 / w<sup>U6b-GDe</sup></i>                           |            |            |
| $\Omega_{A+}$ | Relative fitness (A heterozygotes) | 1.000                                                             | 1.000      | 9          |
| $\Omega_{AA}$ | Relative fitness (A homozygotes)   | 0.900                                                             | 0.900      | 9          |
| $\Omega_{B+}$ | Relative fitness (B heterozygotes) | 0.922*                                                            | 1.00       | 9          |
| $\Omega_{BB}$ | Relative fitness (B homozygotes)   | 0.844*                                                            | 1.00       | 9          |
| $\Phi$        | Homing rate                        | 0.629                                                             | 0.369      | 9          |
|               |                                    | <i>sds3G1-Cas9 / kmo<sup>sgRNAs</sup> (with improved fitness)</i> |            |            |
| $\Omega_{A+}$ | Relative fitness (A heterozygotes) | 1.00                                                              | 1.00       | 1          |
| $\Omega_{AA}$ | Relative fitness (A homozygotes)   | 0.90                                                              | 0.90       | Assumed    |
| $\Omega_{B+}$ | Relative fitness (B heterozygotes) | 1.00                                                              | 1.00       | This study |
| $\Omega_{BB}$ | Relative fitness (B homozygotes)   | 0.91                                                              | 0.45       | This study |
| $\Phi$        | Homing rate                        | 0.87                                                              | 0.71       | This study |

\**nup50-Cas9* fitness costs take the form of fertility/fecundity reductions and are represented by a scaling  $f_j$  applied to each female genotype frequency ( $F_j^i$ ).

## References

1. Anderson, M. A. E. *et al.* A multiplexed, confinable CRISPR/Cas9 gene drive propagates in caged *Aedes aegypti* populations. *bioRxiv* (2022).
2. Edgington, M. P. & Alphey, L. S. Conditions for success of engineered underdominance gene drive systems. *J. Theor. Biol.* **430**, 128–140 (2017).
3. DAVIS, S., BAX, N. & GREWE, P. Engineered Underdominance Allows Efficient and Economical Introgression of Traits into Pest Populations. *J. Theor. Biol.* **212**, 83–98 (2001).
4. Magori, K. & Gould, F. Genetically Engineered Underdominance for Manipulation of Pest Populations: A Deterministic Model. *Genetics* **172**, 2613–2620 (2006).
5. Marshall, J. M. & Hay, B. A. Confinement of gene drive systems to local populations: A comparative analysis. *J. Theor. Biol.* **294**, 153–171 (2012).
6. Dhole, S., Vella, M. R., Lloyd, A. L. & Gould, F. Invasion and migration of spatially self-limiting gene drives: A comparative analysis. *Evol. Appl.* **11**, 794–808 (2018).
7. Unckless, R. L., Clark, A. G. & Messer, P. W. Evolution of Resistance Against CRISPR/Cas9 Gene Drive. *Genetics* **205**, 827–841 (2017).
8. Unckless, R. L., Messer, P. W., Connallon, T. & Clark, A. G. Modeling the Manipulation of Natural Populations by the Mutagenic Chain Reaction. *Genetics* **201**, 425–431 (2015).
